# Supplementary material for: Higher Adiposity Is Associated With Slower Cognitive Decline in Hypertensive Patients: Secondary Analysis of the China Stroke Primary Prevention Trial
Source: PubMed Central journal article supplement — J Am Heart Assoc. 2017 Oct 10;6(10):e005561. doi: 10.1161/JAHA.117.005561 (PMC5721823; doi:10.1161/jaha.117.005561), 2017-10-10
Supplement: JAH3-6-e005561-s001.pdf [file JAH3-6-e005561-s001.pdf]

# **SUPPLEMENTAL MATERIAL**

## **Data S1.**

### **Supplemental Methods**

#### ***Detailed inclusion and exclusion criteria***

Participants were eligible for recruitment into CSPPT if they were aged 45-75 years old with hypertension, defined as seated resting systolic blood pressure  $\geq 140$  mmHg or diastolic blood pressure  $\geq 90$  mmHg, or taking an anti-hypertensive medication. The major exclusion criteria included a history of physician- diagnosed stroke, myocardial infarction (MI) and other cardiovascular diseases (e.g., physician-diagnosed heart failure, post-coronary revascularization, and congenital heart disease).

#### ***Intervention and Follow-Up***

Eligible participants who were tolerant and adhered to enalapril therapy during the 3-week run-in treatment period were randomly assigned to one of two treatment groups in a 1:1 ratio. The treatment allocation here included a daily oral dose of one tablet containing 10mg enalapril and 0.8mg folic acid (the enalapril-folic acid group) and a daily oral dose of one tablet containing 10mg enalapril only (the enalapril group). Other classes of antihypertensive medications, mostly dihydropyridine calcium channel blockers and hydrochlorothiazide, could be prescribed concomitantly if necessary. All patients were scheduled for follow-up every 3 months after randomization. At each visit, trained study staff measured blood pressures and pulses for all participants, and recorded the number of pills that were taken between visits, concomitant medication use, and any adverse events.

#### ***Additional analyses***

To account for potential differences in baseline MMSE scores and fluctuations in MMSE changes, we conducted additional analyses by involving the definition for cognitive impairment in ONTARGET/TRANSCEND studies into the present definition. Cognitive impairment was then defined as a decrease of MMSE scores of 3 or more and to a level of less than education-specific cut-off points at any time during the follow-up. Changes of MMSE scores were calculated by subtracting the score at the last follow-up visit from the MMSE score at baseline. However, baseline MMSE scores were not available for the study participants. Therefore, we used values at 1-year visit to represent missing baseline MMSE values.

**Table S1.** Characteristics of included and excluded participants in the present analysis

| Variable                                      | Total men    | Men included | Men excluded | <i>P</i> value | Total women  | Women included | Women excluded | <i>P</i> value |
|-----------------------------------------------|--------------|--------------|--------------|----------------|--------------|----------------|----------------|----------------|
| No. of participants                           | 8497         | 6758         | 1739         |                | 12205        | 10033          | 2172           |                |
| Age (years), mean (SD)                        | 60.9 (7.6)   | 61.3 (7.4)   | 59.7 (8.1)   | <0.001         | 59.3 (7.4)   | 59.3 (7.4)     | 59.3 (7.7)     | 0.938          |
| Marital status (Married), n (%)               | 7345 (87.4)  | 5880 (87.5)  | 1465 (87.0)  | 0.371          | 10258 (84.8) | 8555 (85.6)    | 1703 (81.2)    | <0.001         |
| Educational level, n (%)                      |              |              |              | 0.100          |              |                |                | 0.341          |
| Illiteracy                                    | 3159 (37.2)  | 2549 (37.7)  | 610 (35.1)   |                | 10067 (82.6) | 8304 (82.8)    | 1763 (81.5)    |                |
| Primary school                                | 2232 (26.3)  | 1749 (25.9)  | 483 (27.8)   |                | 1249 (10.2)  | 1010 (10.1)    | 239 (11.1)     |                |
| Middle school and higher                      | 3103 (36.5)  | 2460 (36.4)  | 643 (37.0)   |                | 879 (7.2)    | 719 (7.2)      | 160 (7.4)      |                |
| Living conditions, n (%)                      |              |              |              | 0.060          |              |                |                | 0.922          |
| Low                                           | 1221 (14.4)  | 942 (13.9)   | 279 (16.1)   |                | 1247 (10.2)  | 1021 (10.2)    | 226 (10.4)     |                |
| Moderate                                      | 6427 (75.7)  | 5147 (76.2)  | 1280 (73.7)  |                | 9436 (77.4)  | 7762 (77.4)    | 1674 (77.3)    |                |
| High                                          | 847 (10.0)   | 669 (9.9)    | 178 (10.2)   |                | 1516 (12.4)  | 1250 (12.5)    | 266 (12.3)     |                |
| SBP at baseline (mmHg), mean (SD)             | 165.2 (20.5) | 165.7 (20.6) | 162.9 (19.6) | <0.001         | 168.1 (20.3) | 168.4 (20.4)   | 166.5 (19.7)   | <0.001         |
| Follow-up mean SBP (mmHg), mean (SD)          | 139.3 (10.8) | 138.7 (10.2) | 141.4 (12.5) | <0.001         | 139.5 (11.0) | 139.0 (10.7)   | 142.0 (12.3)   | <0.001         |
| eGFR (mL/min/1.73 m <sup>2</sup> ), mean (SD) | 92.0 (13.6)  | 91.9 (13.4)  | 92.6 (14.3)  | 0.045          | 94.5 (12.9)  | 94.6 (12.7)    | 94.2 (13.7)    | 0.281          |
| BMI (kg/m <sup>2</sup> ), mean (SD)           | 24.2 (3.4)   | 24.3 (3.4)   | 24.0 (3.4)   | <0.001         | 25.4 (3.8)   | 25.5 (3.8)     | 24.9 (3.8)     | <0.001         |
| WC (cm), mean (SD)                            | 84.2 (10.1)  | 84.4 (10.1)  | 83.7 (10.1)  | 0.006          | 84.4 (9.8)   | 84.5 (9.8)     | 83.6 (9.8)     | <0.001         |
| Current smoking, n (%)                        | 4467 (52.6)  | 3498 (51.8)  | 969 (55.8)   | 0.008          | 402 (3.3)    | 321 (3.2)      | 81 (3.7)       | 0.205          |
| Current alcohol drinking, n (%)               | 4468 (52.6)  | 3528 (52.2)  | 940 (54.1)   | 0.332          | 492 (4.0)    | 390 (3.9)      | 102 (4.7)      | 0.105          |
| Low physical activity, n (%)                  | 2979 (35.1)  | 2421 (35.9)  | 558 (32.1)   | <0.001         | 4561 (37.4)  | 3749 (37.4)    | 812 (37.5)     | 0.881          |
| Treatment allocation, n (%)                   |              |              |              | 0.546          |              |                |                | 0.081          |
| Enalapril                                     | 4252 (50.0)  | 3393 (50.2)  | 859 (49.4)   |                | 6102 (50.0)  | 5053 (50.4)    | 1049 (48.3)    |                |
| Enalapril–folic acid                          | 4245 (50.0)  | 3365 (49.8)  | 880 (50.6)   |                | 6103 (50.0)  | 4980 (49.6)    | 1123 (51.7)    |                |
| Medical comorbidities, n (%)                  |              |              |              |                |              |                |                |                |
| Diabetes at baseline                          | 849 (10.2)   | 677 (10.3)   | 172 (10.0)   | 0.798          | 1439 (12.0)  | 1212 (12.3)    | 227 (10.6)     | 0.028          |
| New diabetes*                                 | 752 (11.3)   | 677 (11.3)   | 75 (10.9)    | 0.775          | 1119 (11.3)  | 1017 (11.3)    | 102 (11.1)     | 0.832          |
| Stroke                                        | 302 (3.6)    | 210 (3.1)    | 92 (5.3)     | <0.001         | 335 (2.7)    | 237 (2.4)      | 98 (4.5)       | <0.001         |

Abbreviations: SBP, systolic blood pressure; eGFR, estimated glomerular filtration rate; BMI, body mass index (calculated as weight in kilograms divided by height in meters squared); WC, waist circumference.

\*New diabetes is defined as having no diabetes at baseline and being diabetic at final follow-up visit.

**Table S2.** Demographic and clinical characteristics of the study participants according to categories of BMI and sex

| Characteristics                               | Men                    |                    |                        |                     |                | Women                  |                    |                        |                     |                |
|-----------------------------------------------|------------------------|--------------------|------------------------|---------------------|----------------|------------------------|--------------------|------------------------|---------------------|----------------|
|                                               | Underweight<br>(n=209) | Normal<br>(n=3018) | Overweight<br>(n=2528) | Obesity<br>(n=1003) | <i>P</i> value | Underweight<br>(n=191) | Normal<br>(n=3352) | Overweight<br>(n=4082) | Obesity<br>(n=2408) | <i>P</i> value |
| Age (years), mean (SD)                        | 65.5 (6.0)             | 62.6 (7.1)         | 60.5 (7.4)             | 58.5 (7.5)          | <0.001         | 63.1 (6.8)             | 60.4 (7.2)         | 58.9 (7.3)             | 58.2 (7.4)          | <0.001         |
| Marital status (Married), n (%)               | 170 (81.7)             | 2555 (85.4)        | 2237 (88.9)            | 918 (91.8)          | <0.001         | 155 (82.4)             | 2749 (82.6)        | 3543 (87.0)            | 2108 (87.8)         | <0.001         |
| Educational, n (%)                            |                        |                    |                        |                     | <0.001         |                        |                    |                        |                     | <0.001         |
| Illiteracy                                    | 104 (49.8)             | 1351 (44.8)        | 830 (32.8)             | 264 (26.3)          |                | 170 (89.0)             | 2838 (84.7)        | 3346 (82.0)            | 1950 (81.0)         |                |
| Primary school                                | 66 (31.6)              | 807 (26.7)         | 629 (24.9)             | 247 (24.6)          |                | 16 (8.4)               | 336 (10.0)         | 415 (10.2)             | 243 (10.1)          |                |
| Middle school and higher                      | 39 (18.7)              | 860 (28.5)         | 1069 (42.3)            | 492 (49.1)          |                | 5 (2.6)                | 178 (5.3)          | 321 (7.9)              | 215 (8.9)           |                |
| Living conditions, n (%)                      |                        |                    |                        |                     | <0.001         |                        |                    |                        |                     | <0.001         |
| Low                                           | 23 (11.0)              | 311 (10.3)         | 420 (16.6)             | 188 (18.7)          |                | 13 (6.8)               | 284 (8.5)          | 455 (11.1)             | 269 (11.2)          |                |
| Moderate                                      | 155 (74.2)             | 2334 (77.3)        | 1908 (75.5)            | 750 (74.8)          |                | 141 (73.8)             | 2612 (77.9)        | 3144 (77.0)            | 1865 (77.5)         |                |
| High                                          | 31 (14.8)              | 373 (12.4)         | 200 (7.9)              | 65 (6.5)            |                | 37 (19.4)              | 456 (13.6)         | 483 (11.8)             | 274 (11.4)          |                |
| SBP at baseline (mmHg), mean (SD)             | 162.2 (18.1)           | 165.8 (21.0)       | 165.9 (20.2)           | 165.9 (21.1)        | 0.098          | 167.7 (16.6)           | 167.2 (19.6)       | 168.5 (20.5)           | 170.1 (21.4)        | <0.001         |
| Follow-up mean SBP (mmHg), mean (SD)          | 138.1 (10.1)           | 138.6 (10.4)       | 138.8 (10.2)           | 138.9 (9.9)         | 0.684          | 138.5 (9.8)            | 138.0 (10.6)       | 138.9 (10.5)           | 140.5 (10.9)        | <0.001         |
| eGFR (mL/min/1.73 m <sup>2</sup> ), mean (SD) | 89.8 (12.3)            | 91.4 (13.0)        | 92.1 (13.7)            | 93.1 (13.8)         | <0.001         | 92.0 (12.8)            | 93.4 (12.3)        | 95.1 (12.6)            | 95.4 (13.3)         | <0.001         |
| Current smoking, n (%)                        | 147 (70.3)             | 1790 (59.3)        | 1146 (45.3)            | 415 (41.4)          | <0.001         | 6 (3.1)                | 120 (3.6)          | 116 (2.8)              | 79 (3.3)            | 0.610          |
| Current alcohol drinking, n (%)               | 90 (43.1)              | 1651 (54.7)        | 1299 (51.4)            | 488 (48.7)          | 0.002          | 11 (5.8)               | 155 (4.6)          | 151 (3.7)              | 73 (3.0)            | 0.062          |
| Low physical activity, n (%)                  | 64 (30.6)              | 902 (29.9)         | 1007 (39.9)            | 448 (44.7)          | <0.001         | 58 (30.4)              | 1092 (32.6)        | 1582 (38.8)            | 1017 (42.3)         | <0.001         |
| Treatment allocation, n (%)                   |                        |                    |                        |                     | 0.833          |                        |                    |                        |                     | 0.290          |
| Enalapril                                     | 108 (51.7)             | 1498 (49.6)        | 1276 (50.5)            | 511 (50.9)          |                | 97 (50.8)              | 1728 (51.6)        | 2048 (50.2)            | 1180 (49.0)         |                |
| Enalapril–folic acid                          | 101 (48.3)             | 1520 (50.4)        | 1252 (49.5)            | 492 (49.1)          |                | 94 (49.2)              | 1624 (48.4)        | 2034 (49.8)            | 1228 (51.0)         |                |
| Medical comorbidities, n (%)                  |                        |                    |                        |                     |                |                        |                    |                        |                     |                |
| Diabetes at baseline                          | 3 (1.4)                | 196 (6.6)          | 320 (13.0)             | 158 (16.1)          | <0.001         | 14 (7.4)               | 286 (8.6)          | 520 (12.9)             | 392 (16.6)          | <0.001         |
| New diabetes*                                 | 13 (7.3)               | 270 (10.2)         | 251 (11.1)             | 143 (15.7)          | <0.001         | 13 (7.7)               | 269 (9.2)          | 418 (11.3)             | 317 (14.6)          | <0.001         |
| Stroke                                        | 7 (3.3)                | 79 (2.6)           | 83 (3.3)               | 41 (4.1)            | 0.116          | 4 (2.1)                | 73 (2.2)           | 95 (2.3)               | 65 (2.7)            | 0.623          |

Abbreviations: BMI, body mass index (calculated as weight in kilograms divided by height in meters squared); SBP, systolic blood pressure; eGFR, estimated glomerular filtration rate.

\*New diabetes is defined as having no diabetes at baseline and being diabetic at final follow-up visit.

**Table S3.** Effects of continuous WC levels on longitudinal change in MMSE score\*

|                                                                 |              | Men                                   |                | Women                                 |                |
|-----------------------------------------------------------------|--------------|---------------------------------------|----------------|---------------------------------------|----------------|
|                                                                 |              | Coefficient $\beta$ (SE) <sup>†</sup> | <i>P</i> value | Coefficient $\beta$ (SE) <sup>†</sup> | <i>P</i> value |
| Effect of time on change in MMSE score (per year/test)          |              |                                       |                |                                       |                |
| Model I <sup>‡</sup>                                            | time         | -0.4814 (0.1013)                      | <0.001         | -0.4015 (0.1068)                      | <0.001         |
| Model II <sup>§</sup>                                           | time (2)     | -1.2336 (0.4069)                      | 0.002          | -1.1374 (0.4235)                      | 0.007          |
|                                                                 | time (3)     | -1.9241 (0.4049)                      | <0.001         | -1.5922 (0.4258)                      | <0.001         |
| Additional effect of WC on change in MMSE score (per year/test) |              |                                       |                |                                       |                |
| Model I                                                         | WC× time     | 0.0044 (0.0012)                       | <0.001         | 0.0014 (0.0013)                       | 0.252          |
| Model II                                                        | WC× time (2) | 0.0136 (0.0048)                       | 0.005          | 0.0122 (0.0050)                       | 0.014          |
|                                                                 | WC× time (3) | 0.0178 (0.0048)                       | <0.001         | 0.0056 (0.0050)                       | 0.261          |

Abbreviations: WC, waist circumference; MMSE, Mini-Mental State Examination

\* The mixed model is adjusted for study center, age and education.

<sup>†</sup> Coefficient  $\beta$  (SE) represents mean change over time for an individual in the reference group (with a WC level of 90/80 cm, which is the higher bound of the normal WC category) and the additional effect of a 1-unit increase in WC on change in MMSE score per year (or per test).

<sup>‡</sup> In Model I, time is modeled as a continuous variable to reflect change in MMSE score per year for an individual in the reference group.

<sup>§</sup> In Model II, time is modeled as a categorical variable to reflect change in MMSE score per test for an individual in the reference group, and time (2) represents comparison of MMSE score at the 3-year follow-up visit vs. the 1-year follow-up visit while time (3) represents comparison of MMSE score between the final follow-up visit and the 1-year follow-up visit.

**Table S4.** Effects of categorical WC status on longitudinal change in MMSE score\*

|                                                                            |                             | Men                                   |                | Women                                 |                |
|----------------------------------------------------------------------------|-----------------------------|---------------------------------------|----------------|---------------------------------------|----------------|
|                                                                            |                             | Coefficient $\beta$ (SE) <sup>†</sup> | <i>P</i> value | Coefficient $\beta$ (SE) <sup>†</sup> | <i>P</i> value |
| Effect of time on change in MMSE score (per year/test)                     |                             |                                       |                |                                       |                |
| Model I <sup>‡</sup>                                                       | time                        | -0.1269 (0.0145)                      | <0.001         | -0.3152 (0.0224)                      | <0.001         |
| Model II <sup>§</sup>                                                      | time (2)                    | -0.1360 (0.0585)                      | 0.020          | -0.2976 (0.0894)                      | <0.001         |
|                                                                            | time (3)                    | -0.5056 (0.0581)                      | <0.001         | -1.2568 (0.0893)                      | <0.001         |
| Additional effect of WC categories on change in MMSE score (per year/test) |                             |                                       |                |                                       |                |
| Model I                                                                    | Abdominal obesity× time     | 0.0663 (0.0257)                       | 0.010          | 0.0502 (0.0268)                       | 0.060          |
| Model II                                                                   | Abdominal obesity× time (2) | 0.1521 (0.1033)                       | 0.141          | 0.2686 (0.1065)                       | 0.012          |
|                                                                            | Abdominal obesity× time (3) | 0.2643 (0.1029)                       | 0.010          | 0.1991 (0.1066)                       | 0.062          |

Abbreviations: WC, waist circumference; MMSE, Mini-Mental State Examination

\* The mixed model is adjusted for study center, age and education.

<sup>†</sup> Coefficient  $\beta$  (SE) represents mean change over time for an individual with a WC level in the reference group of the normal WC category and the additional effect of abdominal obesity (WC  $\geq$  90/80 cm for men/women) on change in MMSE score per year (or per MMSE test).

<sup>‡</sup> In Model I, time is modeled as a continuous variable to reflect change in MMSE score per year for an individual in the reference group.

<sup>§</sup> In Model II, time is modeled as a categorical variable to reflect change in MMSE score per test for an individual in the reference group, and time (2) represents comparison of MMSE score at the 3-year follow-up visit vs. the 1-year follow-up visit while time (3) represents comparison of MMSE score between the final follow-up visit and the 1-year follow-up visit.

**Table S5.** Multivariate-adjusted associations between WC at baseline and change in MMSE score during the follow-up\*

|                                                                            |                             | Men                                   |                | Women                                 |                |
|----------------------------------------------------------------------------|-----------------------------|---------------------------------------|----------------|---------------------------------------|----------------|
|                                                                            |                             | Coefficient $\beta$ (SE) <sup>†</sup> | <i>P</i> value | Coefficient $\beta$ (SE) <sup>†</sup> | <i>P</i> value |
| Effect of time on change in MMSE score (per year/test)                     |                             |                                       |                |                                       |                |
| Model I <sup>‡</sup>                                                       | time                        | -0.4505 (0.1060)                      | <0.001         | -0.4044 (0.1123)                      | <0.001         |
| Model II <sup>§</sup>                                                      | time (2)                    | -1.1417 (0.4392)                      | 0.009          | -1.4601 (0.4559)                      | 0.001          |
|                                                                            | time (3)                    | -1.8024 (0.4240)                      | <0.001         | -1.6155 (0.4472)                      | <0.001         |
| Additional effect of WC on change in MMSE score (per year/test)            |                             |                                       |                |                                       |                |
| Model I                                                                    | WC× time                    | 0.0041 (0.0012)                       | 0.001          | 0.0015 (0.0013)                       | 0.260          |
| Model II                                                                   | WC× time (2)                | 0.0129 (0.0052)                       | 0.012          | 0.0169 (0.0053)                       | 0.002          |
|                                                                            | WC× time (3)                | 0.0166 (0.0050)                       | 0.001          | 0.0062 (0.0053)                       | 0.241          |
| Effect of time on change in MMSE score (per year/test)                     |                             |                                       |                |                                       |                |
| Model I <sup>‡</sup>                                                       | time                        | -0.1205 (0.0152)                      | <0.001         | -0.3168 (0.0236)                      | <0.001         |
| Model II <sup>§</sup>                                                      | time (2)                    | -0.0862 (0.0632)                      | 0.172          | -0.2969 (0.0965)                      | 0.002          |
|                                                                            | time (3)                    | -0.4730 (0.0609)                      | <0.001         | -1.2507 (0.0939)                      | <0.001         |
| Additional effect of WC categories on change in MMSE score (per year/test) |                             |                                       |                |                                       |                |
| Model I                                                                    | Abdominal obesity× time     | 0.0548 (0.0269)                       | 0.042          | 0.0539 (0.0281)                       | 0.055          |
| Model II                                                                   | Abdominal obesity× time (2) | 0.1094 (0.1113)                       | 0.326          | 0.3752 (0.1146)                       | 0.001          |
|                                                                            | Abdominal obesity× time (3) | 0.2168 (0.1077)                       | 0.044          | 0.2209 (0.1119)                       | 0.048          |

Abbreviations: WC, waist circumference; MMSE, Mini-Mental State Examination.

\* The mixed model is adjusted for study center, age, education, smoking, alcohol drinking, marital status, living conditions, physical activity, PHQ scores, systolic blood pressure at baseline, mean systolic blood pressure during the follow-up, estimated glomerular filtration rate, new stroke, diabetes mellitus, and treatment allocation;

<sup>†</sup> Coefficient  $\beta$  (SE) represents mean change over time for an individual in the reference group (with a WC level of 90/80 cm, which is the higher bound of the normal WC category) and the additional effect of a 1-unit increase in WC on change in MMSE score per year, or mean change over time for an individual with a WC level in the reference group of the normal WC category and the additional effect of abdominal obesity (WC  $\geq$  90/80 cm for men/women) on change in MMSE score per year.

<sup>‡</sup> In Model I, time is modeled as a continuous variable to reflect change in MMSE score per year for an individual in the reference group.

<sup>§</sup> In Model II, time is modeled as a categorical variable to reflect change in MMSE score per test for an individual in the reference group, and time (2) represents comparison of MMSE score at the 3-year follow-up visit vs. the 1-year follow-up visit while time (3) represents comparison of MMSE score between the final follow-up visit and the 1-year follow-up visit.

**Table S6.** Associations between baseline WC and longitudinal changes in cognitive domains represented by MMSE subscores\*

| MMSE subscores                        | Men                      |                |                          |                | Women                    |                |                          |                |
|---------------------------------------|--------------------------|----------------|--------------------------|----------------|--------------------------|----------------|--------------------------|----------------|
|                                       | Time <sup>†</sup>        |                | WC× time <sup>‡</sup>    |                | Time                     |                | WC× time                 |                |
|                                       | Coefficient $\beta$ (SE) | <i>P</i> value |
| Orientation to time<br>(0-5 points)   | -0.2270 (0.0346)         | <0.001         | 0.0020 (0.0004)          | <0.001         | -0.1644 (0.0398)         | <0.001         | 0.0002 (0.0005)          | 0.694          |
| Orientation to place<br>(0-5 points)  | -0.0417 (0.0119)         | <0.001         | 0.0003 (0.0001)          | 0.022          | -0.0921 (0.0244)         | <0.001         | 0.0005 (0.0003)          | 0.083          |
| Registration (0–3 points)             | -0.0265 (0.0190)         | 0.162          | 0.0001 (0.0002)          | 0.518          | -0.0095 (0.0216)         | 0.659          | -0.0004 (0.0003)         | 0.162          |
| Attention/calculation<br>(0–5 points) | -0.1240 (0.0493)         | 0.012          | 0.0012 (0.0006)          | 0.047          | -0.0630 (0.0495)         | 0.203          | 0.0005 (0.0006)          | 0.428          |
| Recall (0–3 points)                   | -0.0260 (0.0349)         | 0.456          | 0.0006 (0.0004)          | 0.123          | -0.0233 (0.0328)         | 0.476          | 0.0004 (0.0004)          | 0.314          |
| Language (0–9 points)                 | -0.0335 (0.0331)         | 0.311          | 0.0002 (0.0004)          | 0.635          | -0.0463 (0.0261)         | 0.076          | 0.0002 (0.0003)          | 0.490          |

Abbreviations: WC, waist circumference; MMSE, Mini-Mental State Examination

\* The mixed model is adjusted for study center, age and education.

<sup>†</sup> Time is modeled as a continuous variable to reflect changes in MMSE subscores per year for an individual in the reference group (with a WC level of 80/90 cm for men/women).

<sup>‡</sup> The term of WC × time represents the additional effect of a 1-unit increase in WC on annual changes in MMSE subscores for an individual in the reference group.



**Table S7.** Multivariate-adjusted associations between baseline WC and changes in cognitive domains represented by MMSE subscores\*

| MMSE subscores                          |             | Orientation to time                      |                | Orientation to place                     |                | Registration                             |                | Attention/calculation                    |                | Recall                                   |                | Language                                 |                |
|-----------------------------------------|-------------|------------------------------------------|----------------|------------------------------------------|----------------|------------------------------------------|----------------|------------------------------------------|----------------|------------------------------------------|----------------|------------------------------------------|----------------|
|                                         |             | (0-5 points)                             |                | (0-5 points)                             |                | (0-3 points)                             |                | (0-5 points)                             |                | (0-3 points)                             |                | (0-9 points)                             |                |
|                                         |             | Coefficient<br>$\beta$ (SE) <sup>†</sup> | <i>P</i> value |
| <b>Men</b>                              |             |                                          |                |                                          |                |                                          |                |                                          |                |                                          |                |                                          |                |
| Effect of time (per year/test)          |             |                                          |                |                                          |                |                                          |                |                                          |                |                                          |                |                                          |                |
| Model I <sup>‡</sup>                    | time        | -0.2197 (0.0362)                         | <0.001         | -0.0418 (0.0129)                         | 0.001          | -0.0289 (0.0198)                         | 0.144          | -0.1172 (0.0517)                         | 0.023          | -0.0296 (0.0366)                         | 0.418          | -0.0223 (0.0345)                         | 0.517          |
| Model II <sup>§</sup>                   | time (2)    | -0.2950 (0.1493)                         | 0.048          | -0.0249 (0.0531)                         | 0.639          | -0.1132 (0.0812)                         | 0.163          | -0.4928 (0.2140)                         | 0.021          | -0.3413 (0.1507)                         | 0.024          | 0.0604 (0.1427)                          | 0.672          |
|                                         | time (3)    | -0.8652 (0.1445)                         | <0.001         | -0.1629 (0.0517)                         | 0.002          | -0.1156 (0.0790)                         | 0.144          | -0.4813 (0.2069)                         | 0.020          | -0.1279 (0.1463)                         | 0.382          | -0.0876 (0.1379)                         | 0.525          |
| Additional effect of WC (per year/test) |             |                                          |                |                                          |                |                                          |                |                                          |                |                                          |                |                                          |                |
| Model I                                 | WC×time     | 0.0019 (0.0004)                          | <0.001         | 0.0003 (0.0002)                          | 0.039          | 0.0002 (0.0002)                          | 0.481          | 0.0011 (0.0006)                          | 0.070          | 0.0007 (0.0004)                          | 0.111          | 0.0001 (0.0004)                          | 0.871          |
| Model II                                | WC×time (2) | 0.0033 (0.0018)                          | 0.062          | 0.0003 (0.0006)                          | 0.593          | 0.0014 (0.0010)                          | 0.138          | 0.0051 (0.0025)                          | 0.041          | 0.0051 (0.0018)                          | 0.004          | -0.0017 (0.0017)                         | 0.323          |
|                                         | WC×time (3) | 0.0074 (0.0017)                          | <0.001         | 0.0012 (0.0006)                          | 0.044          | 0.0007 (0.0009)                          | 0.469          | 0.0045 (0.0024)                          | 0.062          | 0.0029 (0.0017)                          | 0.096          | 0.0002 (0.0016)                          | 0.893          |
| <b>Women</b>                            |             |                                          |                |                                          |                |                                          |                |                                          |                |                                          |                |                                          |                |
| Effect of time (per year/test)          |             |                                          |                |                                          |                |                                          |                |                                          |                |                                          |                |                                          |                |
| Model I                                 | time        | -0.1606 (0.0421)                         | <0.001         | -0.1043 (0.0259)                         | <0.001         | -0.0225 (0.0227)                         | 0.322          | -0.0500 (0.0522)                         | 0.338          | -0.0233 (0.0345)                         | 0.500          | -0.0480 (0.0271)                         | 0.077          |
| Model II                                | time (2)    | -0.5556 (0.1697)                         | 0.001          | -0.0153 (0.1047)                         | 0.884          | -0.0523 (0.0919)                         | 0.570          | -0.6516 (0.2128)                         | 0.002          | -0.1693 (0.1400)                         | 0.227          | -0.0627 (0.1103)                         | 0.570          |
|                                         | time (3)    | -0.6362 (0.1667)                         | <0.001         | -0.4052 (0.1031)                         | <0.001         | -0.0860 (0.0905)                         | 0.342          | -0.2259 (0.2087)                         | 0.279          | -0.0916 (0.1377)                         | 0.506          | -0.1934 (0.1084)                         | 0.074          |
| Additional effect of WC (per year/test) |             |                                          |                |                                          |                |                                          |                |                                          |                |                                          |                |                                          |                |
| Model I                                 | WC×time     | 0.0001 (0.0005)                          | 0.795          | 0.0006 (0.0003)                          | 0.041          | -0.0002 (0.0003)                         | 0.446          | 0.0003 (0.0006)                          | 0.601          | 0.0004 (0.0004)                          | 0.332          | 0.0002 (0.0003)                          | 0.458          |
| Model II                                | WC×time (2) | 0.0066 (0.0020)                          | 0.001          | 0.0007 (0.0012)                          | 0.574          | 0.0008 (0.0011)                          | 0.431          | 0.0061 (0.0025)                          | 0.015          | 0.0037 (0.0016)                          | 0.026          | -0.0006 (0.0013)                         | 0.644          |
|                                         | WC×time (3) | 0.0006 (0.0020)                          | 0.772          | 0.0024 (0.0012)                          | 0.047          | -0.0008 (0.0011)                         | 0.439          | 0.0015 (0.0025)                          | 0.529          | 0.0016 (0.0016)                          | 0.322          | 0.0009 (0.0013)                          | 0.461          |

Abbreviations: WC, waist circumference; MMSE, Mini-Mental State Examination

\* The mixed model is adjusted for study center, age, education, smoking, alcohol drinking, marital status, living conditions, physical activity, PHQ scores, systolic blood pressure at baseline, mean systolic blood pressure during the follow-up, estimated glomerular filtration rate, new stroke, diabetes mellitus, and treatment allocation.

<sup>†</sup> Coefficient  $\beta$  (SE) represents mean changes over time for an individual in the reference group (with a WC level of 90/80 cm, which is the higher bound of the normal WC category) and the additional effect of a 1-unit increase in WC on the changes in MMSE subscores per year (or per test).

<sup>‡</sup> In Model I, time is modeled as a continuous variable to reflect changes in MMSE subscores per year for an individual in the reference group.

<sup>§</sup> In Model II, time is modeled as a category variable to reflect changes in MMSE subscores per test for an individual in the reference group, and time (2) represents comparison of MMSE subscores at the 3-year follow-up visit vs. the 1-year follow-up visit while time (3) represents comparison of MMSE subscores between the final follow-up visit and the 1-year follow-up visit.

**Table S8.** Multivariable Cox proportional hazards model for cognitive impairment according to WC at baseline\*

| Variables                | Cognitive Impairment |                   |                   | Cognitive Impairment with stroke |                   |                   | Other Cognitive Impairment |                   |                   |
|--------------------------|----------------------|-------------------|-------------------|----------------------------------|-------------------|-------------------|----------------------------|-------------------|-------------------|
|                          | Events (%)           | Model I           | Model II          | Events (%)                       | Model I           | Model II          | Events (%)                 | Model I           | Model II          |
| Men                      |                      |                   |                   |                                  |                   |                   |                            |                   |                   |
| WC (cm)                  | 1037 (15.3)          | 0.98 (0.98, 0.99) | 0.98 (0.98, 0.99) | 66 (1.0)                         | 0.98 (0.95, 1.00) | 0.97 (0.94, 1.00) | 971 (14.4)                 | 0.98 (0.98, 0.99) | 0.98 (0.98, 0.99) |
| WC category <sup>†</sup> |                      |                   |                   |                                  |                   |                   |                            |                   |                   |
| 0                        | 796 (17.2)           | 1.00 (Ref)        | 1.00 (Ref)        | 50 (1.1)                         | 1.00 (Ref)        | 1.00 (Ref)        | 746 (16.1)                 | 1.00 (Ref)        | 1.00 (Ref)        |
| 1                        | 241 (11.3)           | 0.74 (0.64, 0.86) | 0.76 (0.65, 0.89) | 16 (0.7)                         | 0.70 (0.40, 1.24) | 0.61 (0.32, 1.17) | 225 (10.5)                 | 0.74 (0.64, 0.87) | 0.78 (0.66, 0.92) |
| Women                    |                      |                   |                   |                                  |                   |                   |                            |                   |                   |
| WC (cm)                  | 3317 (33.1)          | 0.99 (0.99, 1.00) | 0.99 (0.99, 1.00) | 93 (0.9)                         | 0.99 (0.97, 1.01) | 0.99 (0.97, 1.01) | 3224 (32.1)                | 0.99 (0.99, 1.00) | 0.99 (0.99, 1.00) |
| WC category              |                      |                   |                   |                                  |                   |                   |                            |                   |                   |
| 0                        | 1099 (36.5)          | 1.00 (Ref)        | 1.00 (Ref)        | 31 (1.0)                         | 1.00 (Ref)        | 1.00 (Ref)        | 1068 (35.4)                | 1.00 (Ref)        | 1.00 (Ref)        |
| 1                        | 2218 (31.6)          | 0.87 (0.81, 0.93) | 0.86 (0.80, 0.93) | 62 (0.9)                         | 0.80 (0.52, 1.24) | 0.79 (0.48, 1.29) | 2156 (30.7)                | 0.87 (0.81, 0.94) | 0.87 (0.80, 0.94) |

Abbreviations: WC, waist circumference

\* For the multivariate-adjusted hazard ratios, data are adjusted for study center, age and education in Model I and additional adjustment for smoking, alcohol drinking, marital status, living conditions, physical activity, PHQ scores, systolic blood pressure at baseline, mean systolic blood pressure during the follow-up, estimated glomerular filtration rate, new stroke (for all cognitive impairment only), diabetes mellitus at baseline, new diabetes mellitus during the follow-up, and treatment allocation in model II.

<sup>†</sup> WC category: 0=normal waistline; 1=abdominal obesity (defined as waist circumference  $\geq$  90/80 cm for men/women).

**Table S9.** Cox proportional hazard model for the risk (hazard ratios and 95% CIs) of cognitive impairment related to adiposity measures before and after imputation of missing data \*

| Adiposity measures           | Total patients    |                   | Age <55 y          |                   | Age (55-<65 y)    |                   | Age ≥65 y         |                   |
|------------------------------|-------------------|-------------------|--------------------|-------------------|-------------------|-------------------|-------------------|-------------------|
|                              | Before imputation | After imputation  | Before imputation  | After imputation  | Before imputation | After imputation  | Before imputation | After imputation  |
| Men                          |                   |                   |                    |                   |                   |                   |                   |                   |
| BMI category                 |                   |                   |                    |                   |                   |                   |                   |                   |
| <18.5                        | 1.25 (0.90, 1.76) | 1.30 (0.97, 1.76) | 1.74 (0.22, 13.77) | 1.93 (0.43, 9.30) | 2.25 (1.27, 3.98) | 1.92 (1.11, 3.31) | 0.93 (0.61, 1.44) | 1.06 (0.73, 1.54) |
| 18.5-23.9                    | 1.00 (Ref)        | 1.00 (Ref)        | 1.00 (Ref)         | 1.00 (Ref)        | 1.00 (Ref)        | 1.00 (Ref)        | 1.00 (Ref)        | 1.00 (Ref)        |
| 24-27.9                      | 0.78 (0.67, 0.91) | 0.74 (0.64, 0.85) | 1.06 (0.69, 1.64)  | 0.95 (0.63, 1.42) | 0.76 (0.58, 1.00) | 0.71 (0.55, 0.95) | 0.75 (0.61, 0.92) | 0.73 (0.60, 0.89) |
| ≥28                          | 0.75 (0.60, 0.94) | 0.72 (0.58, 0.89) | 0.79 (0.45, 1.38)  | 0.62 (0.38, 1.00) | 0.81 (0.56, 1.17) | 0.78 (0.56, 1.10) | 0.70 (0.50, 0.99) | 0.72 (0.52, 0.99) |
| BMI (per kg/m <sup>2</sup> ) | 0.96 (0.94, 0.98) | 0.95 (0.93, 0.97) | 0.97 (0.92, 1.03)  | 0.94 (0.89, 0.99) | 0.96 (0.92, 1.00) | 0.95 (0.92, 0.99) | 0.96 (0.93, 0.99) | 0.95 (0.93, 0.98) |
| WC category <sup>†</sup>     |                   |                   |                    |                   |                   |                   |                   |                   |
| 0                            | 1.00 (Ref)        | 1.00 (Ref)        | 1.00 (Ref)         | 1.00 (Ref)        | 1.00 (Ref)        | 1.00 (Ref)        | 1.00 (Ref)        | 1.00 (Ref)        |
| 1                            | 0.76 (0.65, 0.89) | 0.73 (0.63, 0.85) | 0.90 (0.60, 1.35)  | 0.76 (0.52, 1.11) | 0.77 (0.59, 1.02) | 0.74 (0.57, 0.95) | 0.74 (0.59, 0.93) | 0.73 (0.59, 0.90) |
| WC (per cm)                  | 0.98 (0.98, 0.99) | 0.98 (0.97, 0.99) | 0.99 (0.97, 1.01)  | 0.98 (0.96, 1.00) | 0.98 (0.97, 0.99) | 0.98 (0.97, 0.99) | 0.98 (0.97, 0.99) | 0.98 (0.97, 0.99) |
| Women                        |                   |                   |                    |                   |                   |                   |                   |                   |
| BMI category                 |                   |                   |                    |                   |                   |                   |                   |                   |
| <18.5                        | 1.21 (0.96, 1.53) | 1.20 (0.99, 1.52) | 2.04 (0.99, 4.18)  | 1.95 (0.95, 3.98) | 1.44 (1.00, 2.06) | 1.38 (0.98, 1.93) | 1.03 (0.73, 1.44) | 1.07 (0.79, 1.46) |
| 18.5-23.9                    | 1.00 (Ref)        | 1.00 (Ref)        | 1.00 (Ref)         | 1.00 (Ref)        | 1.00 (Ref)        | 1.00 (Ref)        | 1.00 (Ref)        | 1.00 (Ref)        |
| 24-27.9                      | 0.87 (0.80, 0.95) | 0.86 (0.79, 0.93) | 1.16 (0.95, 1.43)  | 1.11 (0.92, 1.35) | 0.82 (0.72, 0.94) | 0.81 (0.71, 0.92) | 0.78 (0.68, 0.90) | 0.78 (0.69, 0.88) |
| ≥28                          | 0.82 (0.74, 0.91) | 0.84 (0.77, 0.93) | 0.90 (0.70, 1.14)  | 0.93 (0.75, 1.16) | 0.81 (0.69, 0.95) | 0.83 (0.72, 0.97) | 0.78 (0.66, 0.92) | 0.79 (0.67, 0.92) |
| BMI (per kg/m <sup>2</sup> ) | 0.98 (0.97, 0.99) | 0.98 (0.97, 0.99) | 0.99 (0.97, 1.01)  | 0.99 (0.97, 1.01) | 0.97 (0.95, 0.99) | 0.97 (0.96, 0.99) | 0.97 (0.95, 0.99) | 0.97 (0.96, 0.99) |
| WC category <sup>†</sup>     |                   |                   |                    |                   |                   |                   |                   |                   |
| 0                            | 1.00 (Ref)        | 1.00 (Ref)        | 1.00 (Ref)         | 1.00 (Ref)        | 1.00 (Ref)        | 1.00 (Ref)        | 1.00 (Ref)        | 1.00 (Ref)        |
| 1                            | 0.86 (0.80, 0.93) | 0.86 (0.79, 0.92) | 0.96 (0.80, 1.16)  | 0.93 (0.79, 1.11) | 0.80 (0.71, 0.91) | 0.81 (0.72, 0.91) | 0.87 (0.77, 0.99) | 0.86 (0.77, 0.97) |
| WC (per cm)                  | 0.99 (0.99, 1.00) | 0.99 (0.99, 1.00) | 1.00 (0.99, 1.01)  | 1.00 (0.99, 1.01) | 0.99 (0.98, 1.00) | 0.99 (0.98, 1.00) | 0.99 (0.98, 1.00) | 0.99 (0.99, 1.00) |

Abbreviations: BMI, body mass index; WC, waist circumference.

\* Data are adjusted for study center, age, education, smoking, alcohol drinking, marital status, living conditions, physical activity, PHQ scores, systolic blood pressure at baseline, mean systolic blood pressure during the follow-up, estimated glomerular filtration rate, new stroke, diabetes mellitus at baseline, new diabetes mellitus during the follow-up, and treatment allocation.

<sup>†</sup> WC category: 0=normal waistline; 1=abdominal obesity (defined as waist circumference ≥ 90/80 cm for men/women, respectively).

**Table S10.** Cox regression analysis for multivariable-adjusted risk of cognitive impairment related to baseline adiposity measures stratified by age (age < 60 y vs. ≥ 60 y)\*

| Adiposity measures           | Men                  |         |                      |         | P-value for interaction | Women                |         |                      |         | P-value for interaction |
|------------------------------|----------------------|---------|----------------------|---------|-------------------------|----------------------|---------|----------------------|---------|-------------------------|
|                              | age < 60 y           |         | age ≥ 60 y           |         |                         | age < 60 y           |         | age ≥ 60 y           |         |                         |
|                              | HR (95%CI)           | P value | HR (95%CI)           | P value |                         | HR (95%CI)           | P value | HR (95%CI)           | P value |                         |
| BMI (per kg/m <sup>2</sup> ) | 0.96 (0.92, 1.00)    | 0.038   | 0.95 (0.92, 0.97)    | <0.001  | 0.525                   | 0.98 (0.97, 1.00)    | 0.048   | 0.96 (0.95, 0.98)    | <0.001  | 0.039                   |
| BMI category                 |                      |         |                      |         |                         |                      |         |                      |         |                         |
| <18.5                        | 3.03 (1.43, 6.38)    | 0.004   | 1.16 (0.80, 1.69)    | 0.437   |                         | 1.61 (1.02, 2.53)    | 0.040   | 1.22 (0.93, 1.60)    | 0.150   |                         |
| 18.5-23.9                    | 1.00 (Ref)           |         | 1.00 (Ref)           |         |                         | 1.00 (Ref)           |         | 1.00 (Ref)           |         |                         |
| 24-27.9                      | 0.90 (0.67, 1.21)    | 0.486   | 0.70 (0.59, 0.84)    | <0.001  |                         | 0.95 (0.83, 1.10)    | 0.496   | 0.80 (0.72, 0.90)    | <0.001  |                         |
| ≥28                          | 0.71 (0.48, 1.05)    | 0.090   | 0.70 (0.53, 0.93)    | 0.013   |                         | 0.86 (0.73, 1.01)    | 0.071   | 0.74 (0.65, 0.85)    | <0.001  |                         |
| P value for trend            |                      | 0.017   |                      | <0.001  |                         |                      | 0.020   |                      | <0.001  |                         |
| WC (per cm)                  | 0.985 (0.971, 0.999) | 0.033   | 0.980 (0.971, 0.988) | <0.001  | 0.452                   | 0.997 (0.990, 1.003) | 0.330   | 0.990 (0.985, 0.995) | <0.001  | 0.068                   |
| WC category <sup>†</sup>     |                      |         |                      |         |                         |                      |         |                      |         |                         |
| 0                            | 1.00 (Ref)           |         | 1.00 (Ref)           |         |                         | 1.00 (Ref)           |         | 1.00 (Ref)           |         |                         |
| 1                            | 0.78 (0.58, 1.04)    | 0.087   | 0.73 (0.60, 0.88)    | 0.001   |                         | 0.91 (0.80, 1.04)    | 0.167   | 0.84 (0.76, 0.92)    | <0.001  |                         |

Abbreviations: BMI, body mass index; WC, waist circumference; HR, hazard ratio

\* Data are adjusted for study center, age, education, smoking, alcohol drinking, marital status, living conditions, physical activity, PHQ scores, systolic blood pressure at baseline, mean systolic blood pressure during the follow-up, estimated glomerular filtration rate, new stroke, diabetes mellitus at baseline, new diabetes mellitus during the follow-up, and treatment allocation.

<sup>†</sup> WC category: 0=normal waistline; 1=abdominal obesity (defined as waist circumference ≥ 90/80 cm for men/women, respectively).

**Figure S1.** Relationship between WC at baseline and risk of cognitive impairment by penalized splines

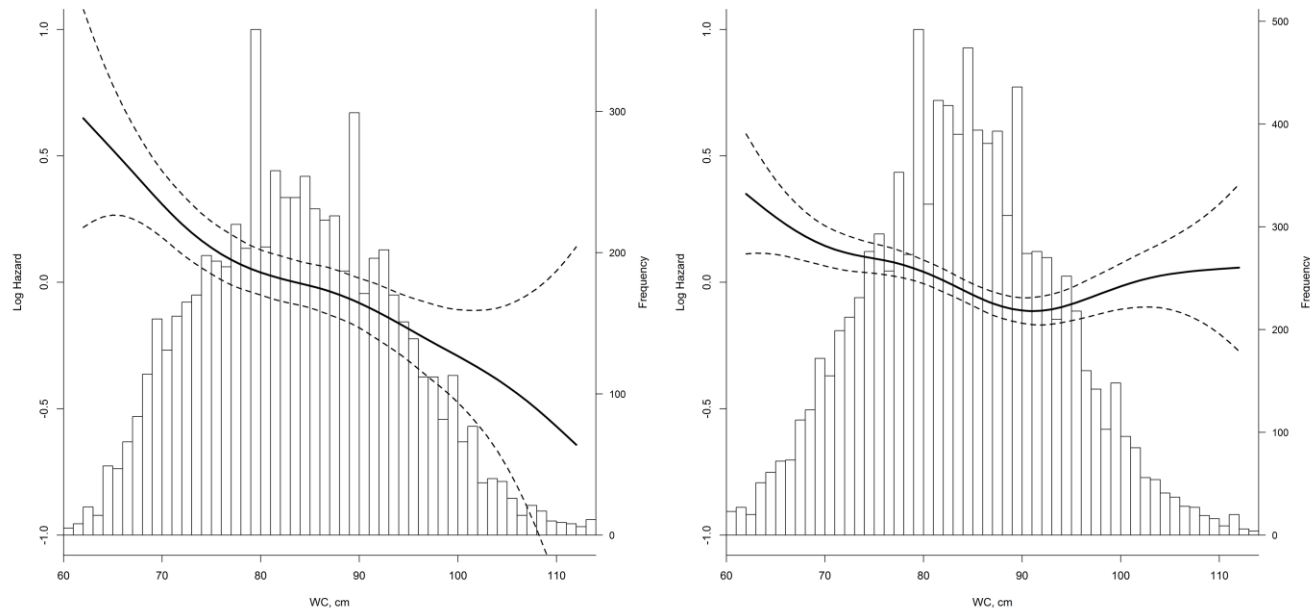

The relative risk of cognitive impairment in association with WC is shown in Panel A for men and Panel B for women. Solid lines represent the log hazard ratios for WC as a continuous variable and dashed lines represent the 95% confidence intervals. The graphs are truncated at the 1<sup>st</sup> and 99<sup>th</sup> percentiles of WC. Analyses are adjusted for study center, age, education, smoking status, alcohol drinking, marital status, living conditions, physical activity, PHQ scores, SBP at baseline, mean SBP during the follow-up, eGFR, new stroke, diabetes mellitus at baseline, new diabetes mellitus during the follow-up, and treatment allocation. Abbreviations: WC, waist circumference; PHQ, Patient Health Questionnaire; SBP, systolic blood pressure; eGFR, estimated glomerular filtration rate.

**Figure S2.** Relationship between BMI at baseline and risk of cognitive impairment in exploratory subgroups

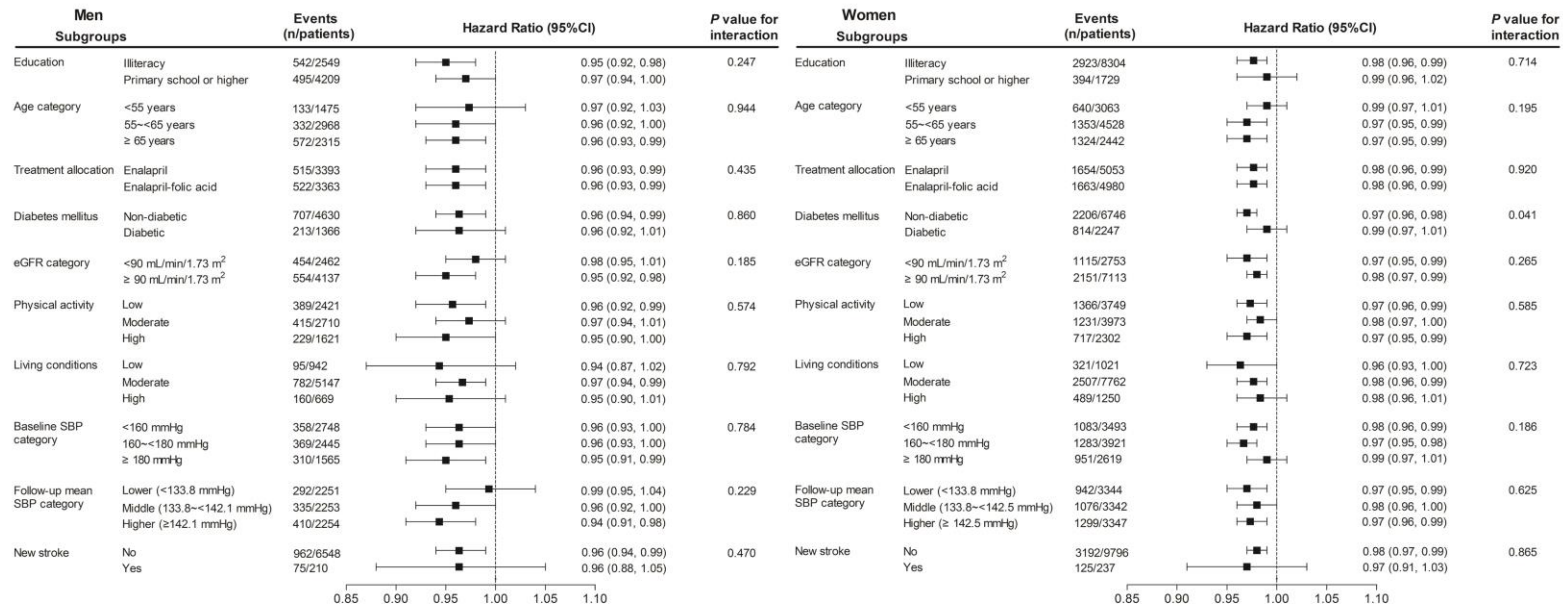

The squares and horizontal lines indicate hazard ratios and 95% confidence interval, respectively. These analyses are restricted to participants with non-missing data of subgroup variables at baseline. Hazard ratios are adjusted, if not stratified, for study center, age, education, smoking status, alcohol drinking, marital status, living conditions, physical activity, PHQ scores, SBP at baseline, mean SBP during the follow-up, eGFR, new stroke, diabetes mellitus, and treatment allocation. Diabetes mellitus in the subgroup analysis includes both diabetes mellitus at baseline and new diabetes mellitus during the follow-up. Abbreviations: BMI, body mass index; PHQ, Patient Health Questionnaire; SBP, systolic blood pressure; eGFR, estimated glomerular filtration rate

**Figure S3.** Sensitivity analyses according to baseline BMI and WC after excluding participants with chronic kidney diseases (CKD) at baseline, new stroke during the follow-up and cognitive impairment at the 1-year follow-up

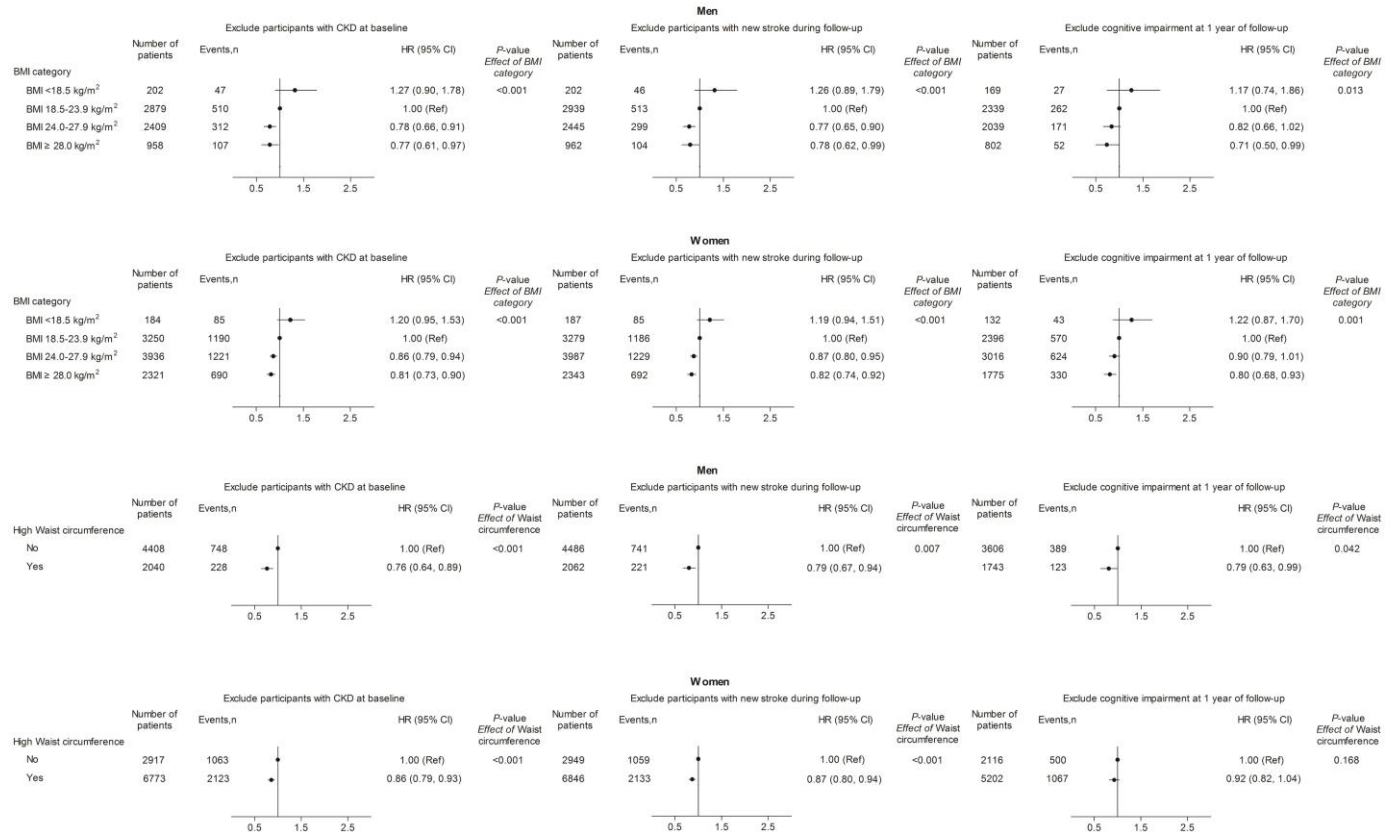

Analyses are adjusted for study center, age, education, smoking status, alcohol drinking, marital status, living conditions, physical activity, PHQ scores, SBP at baseline, mean SBP during the follow-up, eGFR, new stroke (not adjusted if participants with new stroke are excluded), diabetes mellitus at baseline, new diabetes mellitus during the follow-up, and treatment allocation. Abbreviations: BMI, body mass index; WC, waist circumference; PHQ, Patient Health Questionnaire; SBP, systolic blood pressure; eGFR, estimated glomerular filtration rate

**Figure S4.** Sensitivity analyses according to baseline BMI and WC categories using other ethnic-specific cut-points

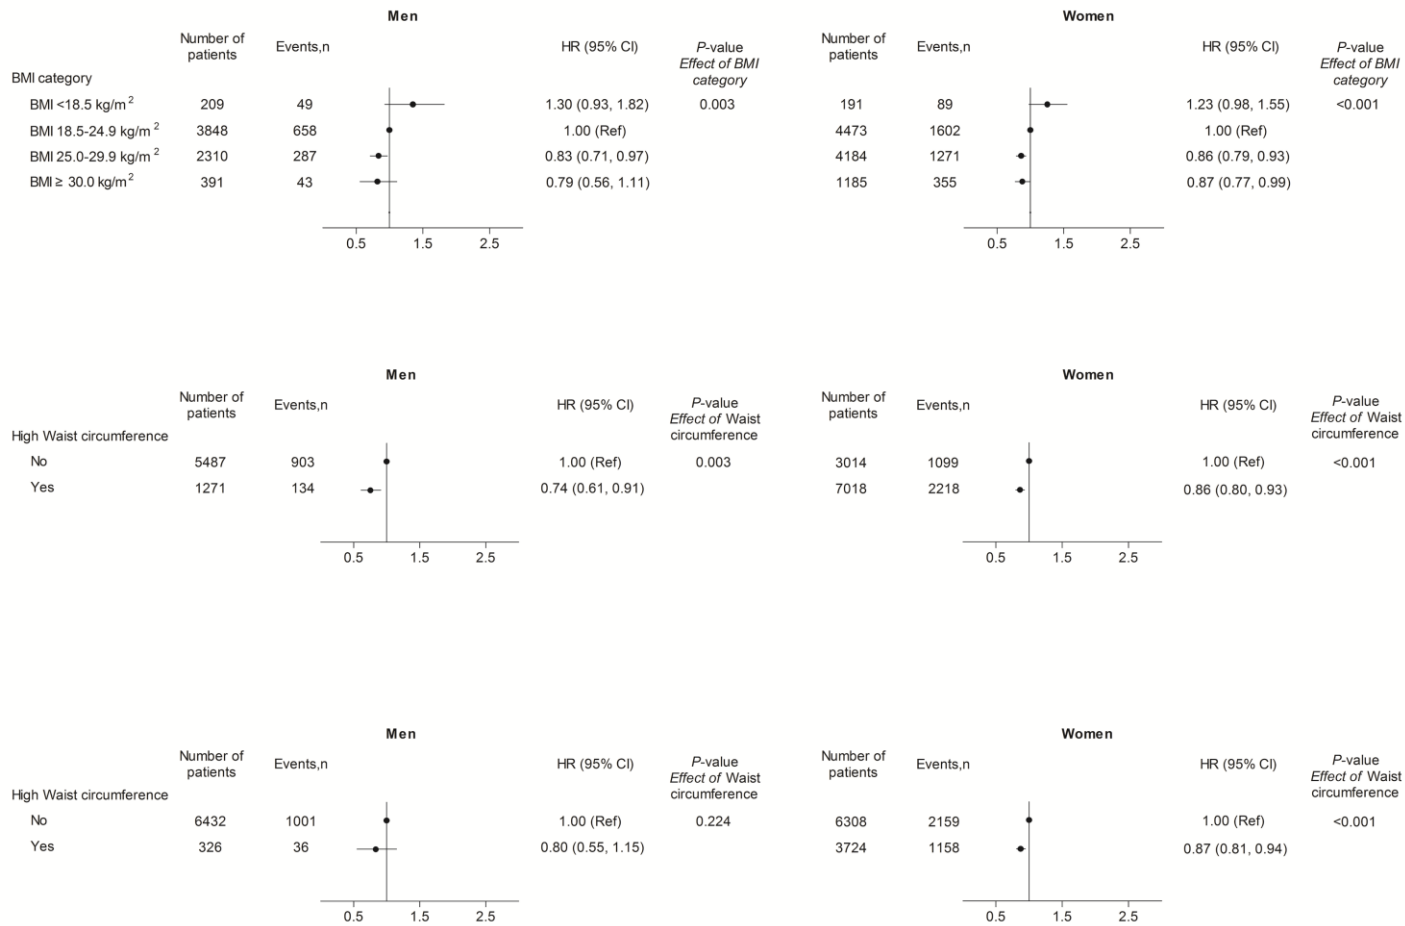

Analyses are adjusted for study center, age, education, smoking status, alcohol drinking, marital status, living conditions, physical activity, PHQ scores, SBP at baseline, mean SBP during the follow-up, eGFR, new stroke, diabetes mellitus at baseline, new diabetes mellitus during the follow-up, and treatment allocation. Abbreviations: BMI, body mass index; WC, waist circumference; SBP, systolic blood pressure; eGFR, estimated glomerular filtration rate. High waist circumference is defined as  $\geq 94$  cm for men and  $\geq 80$  cm for women in the middle row, and  $\geq 102$  cm for men and  $\geq 88$  cm for women in the last row



**Figure S5.** Relationship between BMI and WC at baseline and risk of cognitive impairment when using alternative definition

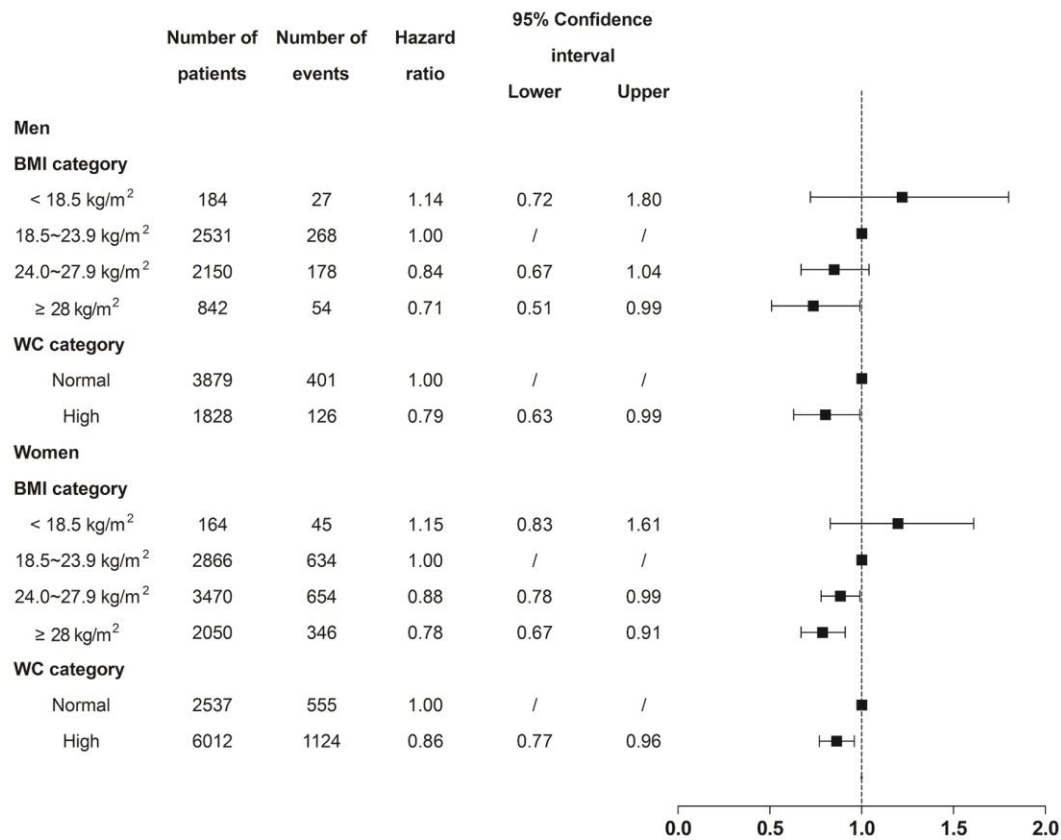

Cognitive impairment is defined as a decrease of MMSE scores of 3 or more and to a level of less than education-specific cut-off points at any time during the follow-up. Adjusted for study center, age, education, smoking, alcohol drinking, marital status, living conditions, physical activity, PHQ scores, SBP at baseline, mean SBP during the follow-up, eGFR, new stroke, diabetes mellitus at baseline, new diabetes mellitus during the follow-up, and treatment allocation. The references are the normal-weight BMI category (18.5–23.9 kg/m<sup>2</sup>) and normal WC category (< 90 cm for men and < 80 cm for women). These analyses are restricted to participants with non-missing data of MMSE value at the 1-year follow-up visit. The squares and horizontal lines indicate hazard ratios and 95% confidence intervals, respectively. Abbreviations: BMI, body mass index; WC, waist circumference; PHQ, Patient Health Questionnaire; SBP, systolic blood pressure; eGFR, estimated glomerular filtration rate

**Figure S6.** Number of concomitant antihypertensive drugs according to treatment allocation and BMI categories at final follow-up visit

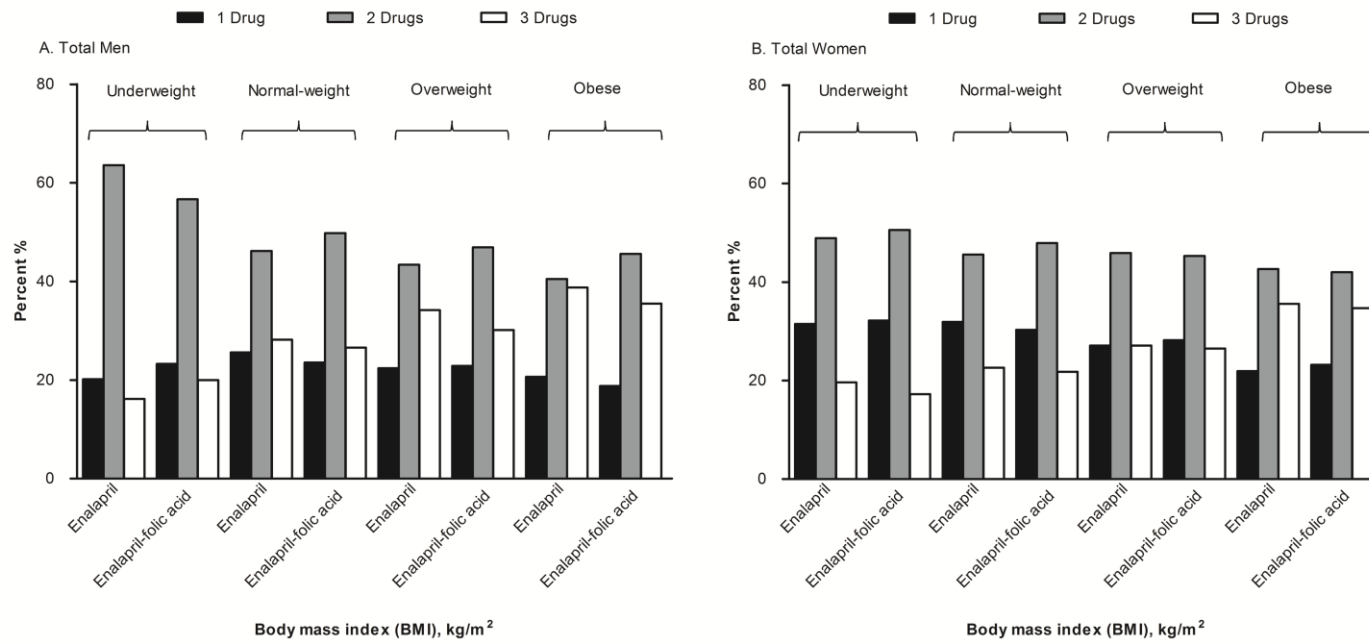

**Figure S7.** Blood pressures at baseline and during the follow-up by baseline BMI categories

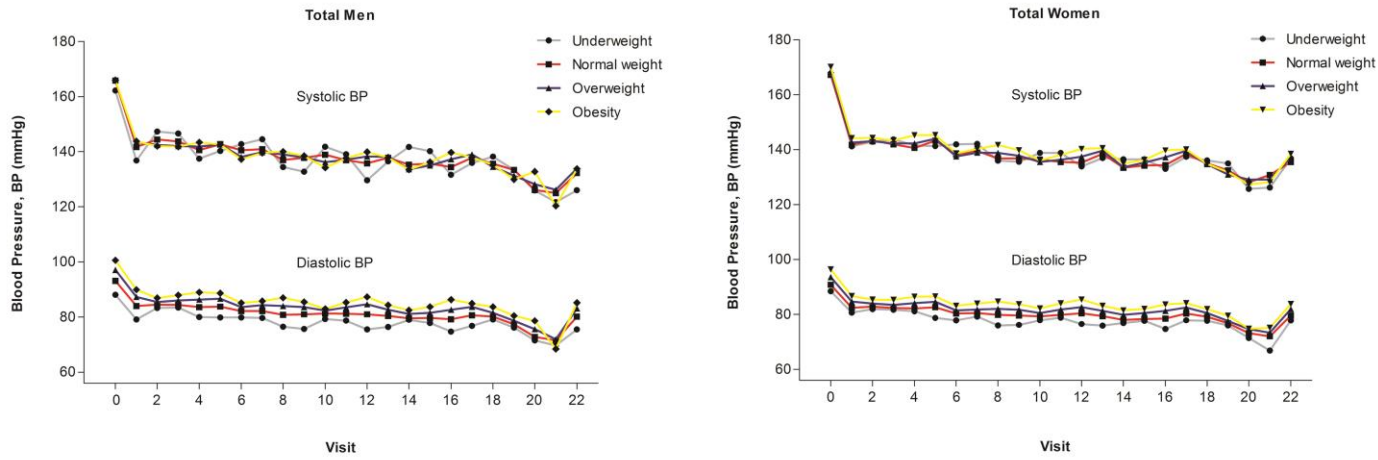

Longitudinal change in blood pressure (BP, mmHg) over the trail period by baseline BMI category

|                                                                                 | Men                              |                                  | Women                            |                                  |
|---------------------------------------------------------------------------------|----------------------------------|----------------------------------|----------------------------------|----------------------------------|
|                                                                                 | SBP [ $\beta$ (SE)] <sup>a</sup> | DBP [ $\beta$ (SE)] <sup>a</sup> | SBP [ $\beta$ (SE)] <sup>a</sup> | DBP [ $\beta$ (SE)] <sup>a</sup> |
| <b>Associations Between Obesity Status and Baseline BP Levels</b>               |                                  |                                  |                                  |                                  |
| Obesity Status <sup>b</sup>                                                     |                                  |                                  |                                  |                                  |
| Underweight                                                                     | -0.851 (0.836)                   | -3.263 (0.576) <sup>c</sup>      | 0.639 (0.901)                    | -1.905 (0.549) <sup>c</sup>      |
| Overweight                                                                      | -0.588 (0.318)                   | 2.474 (0.219) <sup>c</sup>       | 0.392 (0.284)                    | 1.843 (0.173) <sup>c</sup>       |
| Obese                                                                           | -0.655 (0.431)                   | 4.738 (0.296) <sup>c</sup>       | 2.144 (0.325) <sup>c</sup>       | 3.973 (0.198) <sup>c</sup>       |
| Normal-weight                                                                   | Reference                        | Reference                        | Reference                        | Reference                        |
| <b>Associations Between Obesity Status and Longitudinal Change in BP Levels</b> |                                  |                                  |                                  |                                  |
| Time                                                                            |                                  |                                  |                                  |                                  |
|                                                                                 | -0.854 (0.012) <sup>c</sup>      | -0.395 (0.007) <sup>c</sup>      | -0.791 (0.011) <sup>c</sup>      | -0.332 (0.006) <sup>c</sup>      |
| Obesity Status                                                                  |                                  |                                  |                                  |                                  |
| Underweight $\times$ time                                                       | 0.027 (0.043)                    | -0.012 (0.024)                   | -0.002 (0.046)                   | -0.022 (0.024)                   |
| Overweight $\times$ time                                                        | 0.067 (0.017) <sup>c</sup>       | 0.002 (0.010)                    | 0.045 (0.015) <sup>c</sup>       | 0.017 (0.008) <sup>c</sup>       |
| Obese $\times$ time                                                             | 0.091 (0.024) <sup>c</sup>       | -0.011 (0.013)                   | 0.019 (0.017)                    | 0.003 (0.009)                    |
| Normal-weight $\times$ time                                                     | Reference                        | Reference                        | Reference                        | Reference                        |

Abbreviations: BMI, body mass index; SBP, systolic blood pressure; DBP, diastolic blood pressure.

<sup>a</sup> Coefficient  $\beta$  (SE) represented average change over time for an individual with a BMI level in the normal-weight category and additional effect of being underweight or overweight or obese on the change in SBP and DBP levels.

<sup>b</sup> Obesity status as defined according to the Chinese criterion based on Cooperative Meta-Analysis Group of the Working Group on Obesity in China. Underweight indicates less than 18.5 kg/m<sup>2</sup>, normal-weight, 18.5 to less than 24 kg/m<sup>2</sup>, overweight, 24 to less than 28 kg/m<sup>2</sup>, and obese, 28 kg/m<sup>2</sup> or more.

<sup>c</sup>  $P < 0.05$ .

**Figure S8.** Cox regression analysis of sex-specific risk of cognitive impairment related to baseline BMI and WC categories according to age tertiles

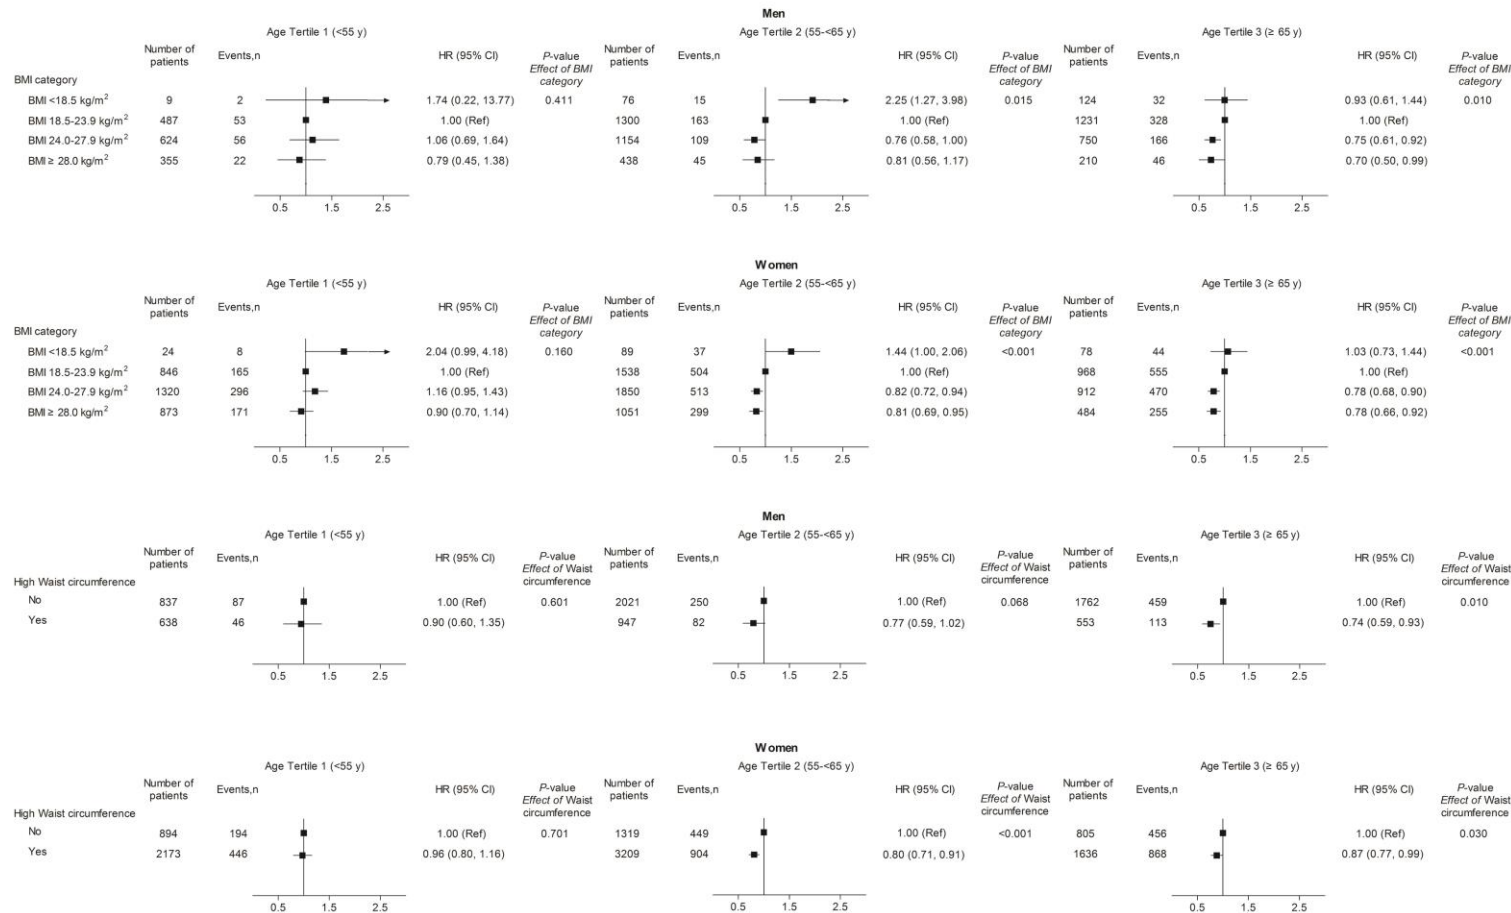

Adjusted for study center, age, education, smoking, alcohol drinking, marital status, living conditions, physical activity, PHQ scores, SBP at baseline, mean SBP during the follow-up, eGFR, new stroke, diabetes mellitus at baseline, new diabetes mellitus during the follow-up, and treatment allocation. The references are the normal-weight BMI category (18.5–23.9 kg/m<sup>2</sup>) and normal WC category (< 90 cm for men and < 80 cm for women). Squares and horizontal lines represent hazard ratios and 95% confidence intervals, respectively. The y-axis corresponds to an HR of 1. Abbreviations: BMI, body mass index; WC, waist circumference; PHQ, Patient Health Questionnaire; SBP, systolic blood pressure; eGFR, estimated glomerular filtration rate
